# Supplementary material for: MiR-146a affects the alteration in myeloid differentiation induced by hydroquinone in human CD34+hematopoietic progenitor cells and HL-60 cells
Source: Royal Society of Chemistry journal article supplement (doi:10.1039/c5tx00419e), 2016-01-01
Supplement: c5tx00419e1.pdf [file c5tx00419e1.pdf]

Table 1. The primer sequences of qRT-PCR

| Gene            | Forward primer                 | Reverse primer                 |
|-----------------|--------------------------------|--------------------------------|
| IRAK1           | 5'-TACCTGCCCCGAGGAGTACATCAA-3' | 5'-TCCTCTTCCACCAGGTCTTTCAGA-3' |
| TRAF6           | 5'-GCTTGATGGCATTACGAGAAG-3'    | 5'-GCAGTATTTTCATTGTCAACTGG-3'  |
| TIRAP           | 5'-TGGTGCAAGTACCAGATGCT-3'     | 5'-GACTTGACGAAAGCCACCAT-3'     |
| NF- $\kappa$ B1 | 5'-CCTGGATGACTCTTGGGAAA-3'     | 5'-TCAGCCAGCTGTTTCATGTC-3'     |
| NF- $\kappa$ B2 | 5'-GAGACATGGAGAGTTGCTAC-3'     | 5'-GCCTTCACAGCCATATCGAA-3'     |
| $\beta$ -actin  | 5'-GCACTCTTCCAGCCTTCC-3'       | 5'-AGAAAGGGTGTAACGCAACTAAG-3'  |
