# Supplementary material for: MiR-146a affects the alteration in myeloid differentiation induced by hydroquinone in human CD34+hematopoietic progenitor cells and HL-60 cells
Source: Royal Society of Chemistry journal article supplement (doi:10.1039/c5tx00419e), 2016-01-01
Supplement: c5tx00419e3.pdf [file c5tx00419e3.pdf]

**Supplementary figure legends:**

**Figure1.** Hematopoietic progenitor cells colony formation assay (40×). CD34<sup>+</sup> HPCs were treated with and plated in triplicate in semi-solid methylcellulose culture for colony-forming cell (CFC) assays and the colony-forming were observed under microscope at 12 days after initiating seeding. A: CFU-E; B: BFU-E; C: CFU-M; D: CFU-G; E: CFU-GM; F: CFU-GEMM
