# Supplementary figures and images for: MiR-146a affects the alteration in myeloid differentiation induced by hydroquinone in human CD34+hematopoietic progenitor cells and HL-60 cells
Source: Royal Society of Chemistry journal article supplement (doi:10.1039/c5tx00419e), 2016-01-01

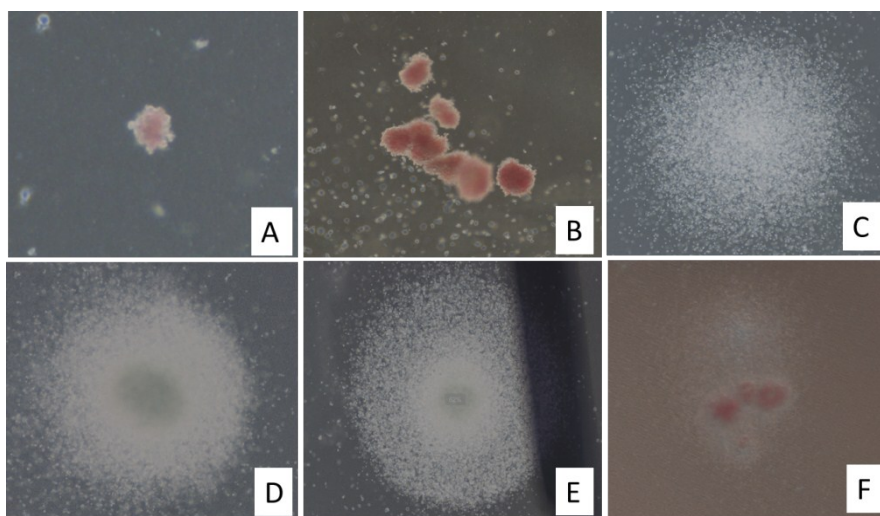

Supplement: c5tx00419e2.pdf [file c5tx00419e2.pdf]
